# Supplementary material for: Durum Wheat Grain Yield and Quality under Low and High Nitrogen Conditions: Insights into Natural Variation in Low- and High-Yielding Genotypes
Source: PubMed Central journal article supplement (PMC7760076; doi:10.3390/plants9121636), 2020-11-24
Supplement: plants-09-01636-s001.pdf [file plants-09-01636-s001.pdf]

**Table S1.** Pedigree and selection history of the 20 durum wheat genotypes obtained from the International Maize and Wheat Improvement Center (CIMMYT, Mexico).

| Genotypes | Pedigree                                                                                                                  |
|-----------|---------------------------------------------------------------------------------------------------------------------------|
| 1         | ALTAR 84/STINT//SILVER_45/3/GUANAY/4/GREEN_14//YAV_10/AUK/5/GUAYACAN INIA/... (CDSS11B00002S-0133Y-055M-2Y-0M)            |
| 2         | BYBLOS/7/WID22256/5/ALTAR 84/STINT//SILVER_45/3/GUANAY/4/GREEN_14//YAV_10/... (CDSS12Y00252S-09Y-018M-2Y-0M)              |
| 3         | BYBLOS/7/WID22256/5/ALTAR 84/STINT//SILVER_45/3/GUANAY/4/GREEN_14//YAV_10/... (CDSS12Y00252S-09Y-018M-9Y-0M)              |
| 4         | CBC 509 CHILE/6/ECO/CMH76A.722//BIT/3/ALTAR 84/4/AJAIA_2/5/KJOVE_1/7/AJAIA_12//... (CDSS12Y00717T-035Y-017M-1Y-0M)        |
| 5         | SILVER_14/MOEWE//BISU_1/PATKA_3/3/PORRON_4/YUAN_1/9/USDA595/3/D67.3/RABI//CRA/4/... (CDSS11B00068S-066Y-064M-10Y-0M)      |
| 6         | CBC 509 CHILE/6/ECO/CMH76A.722//BIT/3/ALTAR 84/4/AJAIA_2/5/KJOVE_1/7/AJAIA_12//... (CDSS11B00319T-044Y-028M-39Y-0M)       |
| 7         | ALTAR 84/STINT//SILVER_45/3/GUANAY/4/GREEN_14//YAV_10/AUK/5/SOMAT_4/INTER_8/6/... (CDSS11B00351T-072Y-051M-20Y-0M)        |
| 8         | ADAMAR_15//ALBIA_1/ALTAR 84/3/SNITAN/4/SOMAT_4/INTER_8/5/SOOTY_9/RASCON_37/6/... (CDSS11B00356T-045Y-025M-41Y-0M)         |
| 9         | SOOTY_9/RASCON_37//GUAYACAN INIA/11/BOOMER_33/ZAR/3/BRAK_2/AJAIA_2//... (CDSS12Y00165S-072Y-032M-23Y-0M)                  |
| 10        | SILVER_14/MOEWE//BISU_1/PATKA_3/3/PORRON_4/YUAN_1/9/USDA595/3/D67.3/RABI//CRA/4/... (CDSS11B00138S-078Y-055M-15Y-0M)      |
| 11        | GERUFTEL-1//GUAYACAN INIA/2*SNITAN (CDSS10Y00291S-099Y-044M-5Y-2M-06Y-0B)                                                 |
| 12        | CBC 509 CHILE/SOMAT_3.1//BOOMER_18/LOTUS_4/6/SOMAT_3/PHAX_1//TILO_1/... (CDSS10Y00493T-099Y-035M-9Y-4M-06Y-0B)            |
| 13        | CMH83.2578/4/D88059//WARD/YAV79/3/ACO89/5/2*SOOTY_9/RASCON_37/6/1A.1D 5+1-06/... (CDSS10B00122T-099Y-011M-4Y-0M-06Y-0B)   |
| 14        | MOHAWK/6/LOTUS_5/F3LOCAL(SEL.ETHIO.135.85)/5/CHEN... (CDSS11Y00431S-099Y-032M-13Y-0M-06Y-0B)                              |
| 15        | MOHAWK/6/LOTUS_5/F3LOCAL(SEL.ETHIO.135.85)/5/CHEN... (CDSS11Y00438S-099Y-029M-16Y-0M-06Y-0B)                              |
| 16        | LABUD/NIGRIS_3//GAN/3/AJAIA_13/YAZI/10/PLATA_10/6/MQUE/4/USDA573//QFN/AA_7/3/... (CDSS07Y00042S-099Y-099M-15Y-1M-04Y-0B)  |
| 17        | MÂALI/5/LOTUS_5/SORD_1/3/CANELO_8//SORA/2*PLATA_12/4/YAZI_1/AKAKI_4//SOMAT_3/3/... (CDSS06B00054S-099Y-099M-1Y-1B-04Y-0B) |
| 18        | MÂALI/6/MUSK_1//ACO89/FNFOOT_2/4/MUSK_4/3/PLATA_3//CREX/ALLA/5/OLUS*2//ILBOR//... (CDSS07Y00784D-2B-07Y-07M-7Y-4B-04Y-0B) |
| 19        | YAZI_1/AKAKI_4//SOMAT_3/3/AUK/GUIL/GREEN/5/2*NETTA_4/DUKEM_12//RASCON_19/3/SORA/... (CDSS04B00346T-0TOPY-3Y-0M-4Y-3Y-0B)  |
| 20        | C F4 20 S/4/YAZI_1/AKAKI_4//SOMAT_3/3/AUK/GUIL//GREEN/5/CANELO_9.1//SHAKE_3/... (CDSS09B00035S-099Y-069M-8Y-4M-06Y-0B)    |
